# Supplementary material for: Ffar2 expression regulates leukaemic cell growth in vivo
Source: PubMed Central journal article supplement — Br J Cancer. 2017 Sep 5;117(9):1336–40. doi: 10.1038/bjc.2017.307 (PMC5672929; doi:10.1038/bjc.2017.307), 2017-09-05
Supplement: bjc2017307x1.pdf [file bjc2017307x1.pdf]

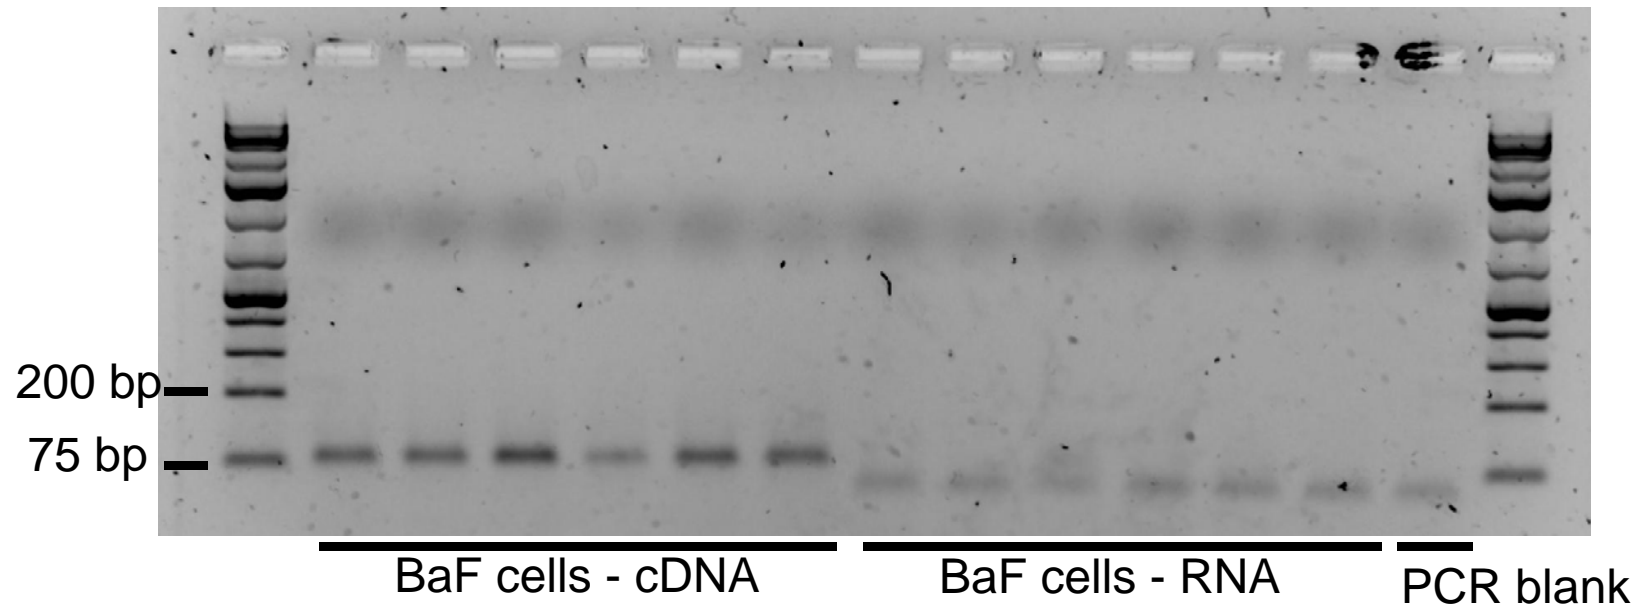

**Figure S1: No genomic DNA contamination and amplification products of the expected size were found.** Agarose gel of amplification products obtained using mouse *Ffar2* primers for BaF cells, expected product size of 80pb, and human *Ffar2* primers for HL-60 cells, expected product size of 177 pb.

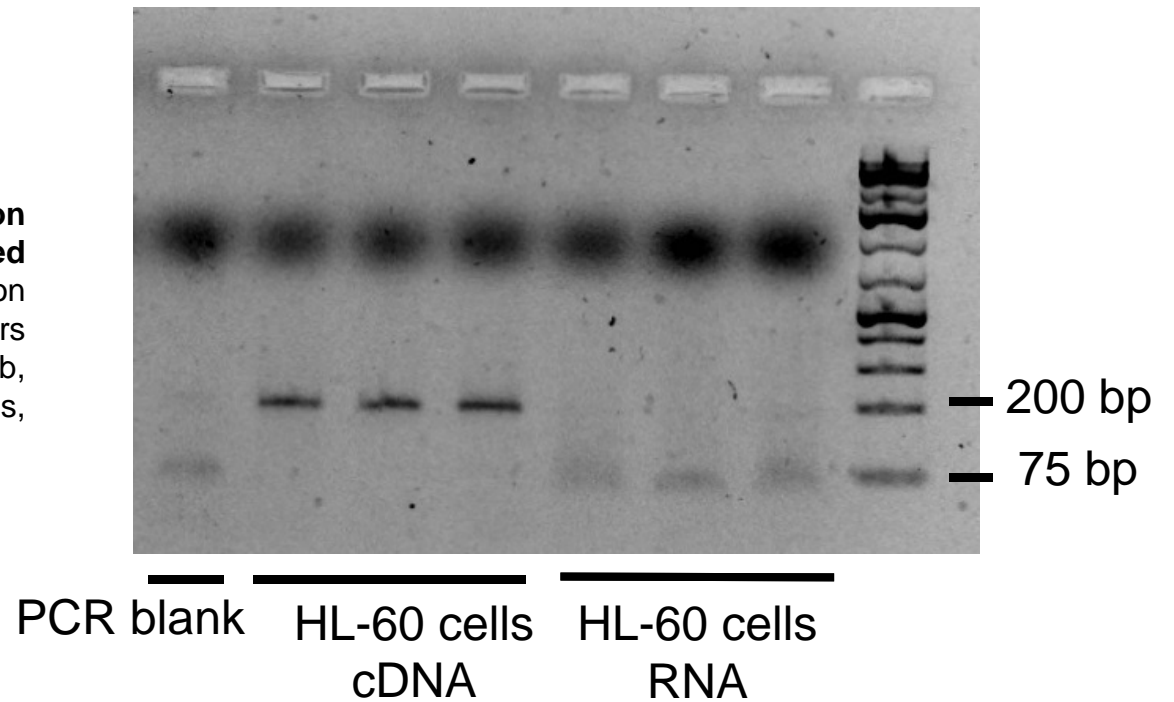

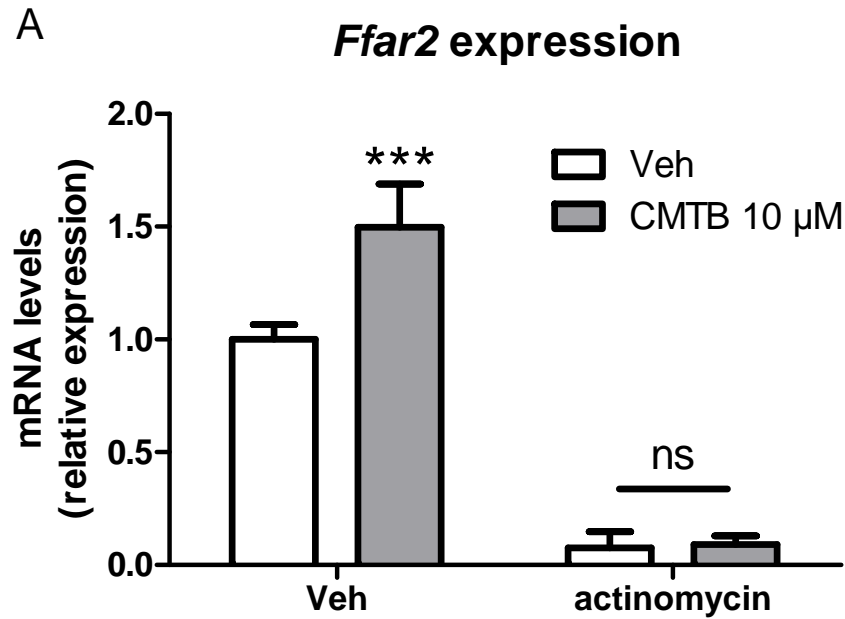

**Figure S2: CMTB regulates *Ffar2* expression at the transcriptional level independently of an induction of STAT3.** *Ffar2* expression after 8 h of incubation with CMTB with a 1 h pre-treatment with 2  $\mu$ g/ml actinomycin D (A). Ratio phospho-Y705-STAT3/STAT3 in BaF cells incubated for 24h with CMTB 10 $\mu$ M (B), trichostatin A 50 nM (C), imatinib mesylate 0,5 $\mu$ M (D) and propionate 2 mM (E). Control (CT) cells were treated with the respective vehicle. \*\*\*  $P < 0.001$  vs vehicle (Veh). Results of 3 independent experiments are shown.

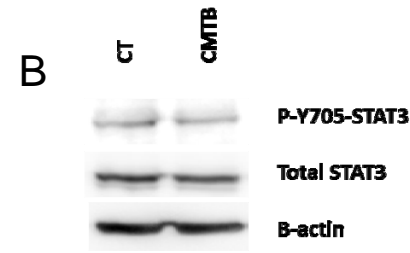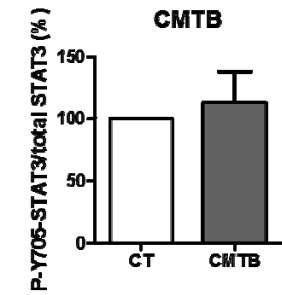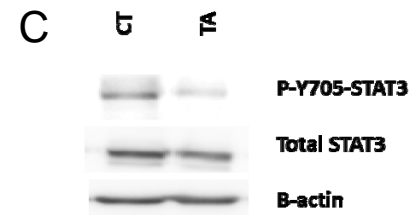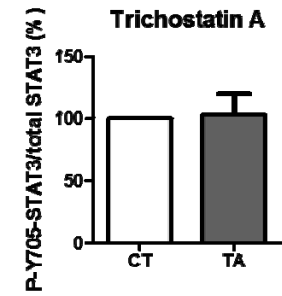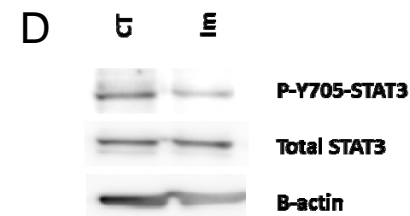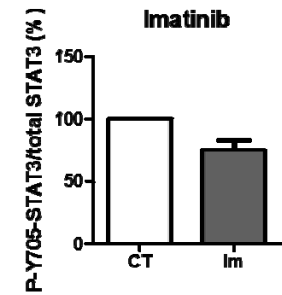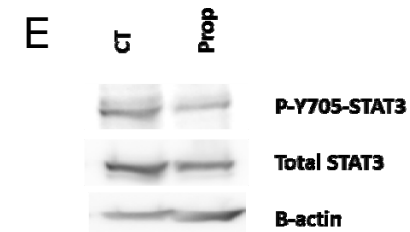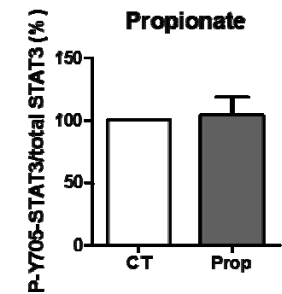

## HL-60

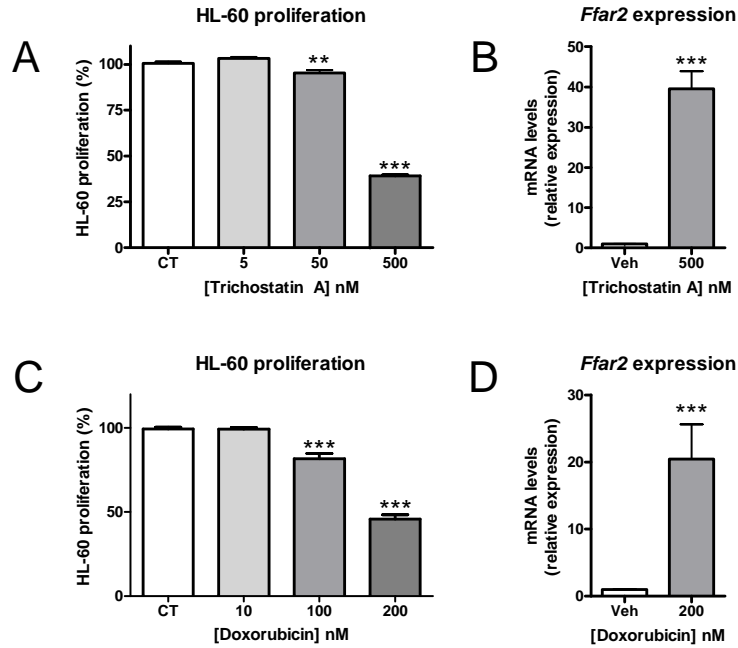

## U937

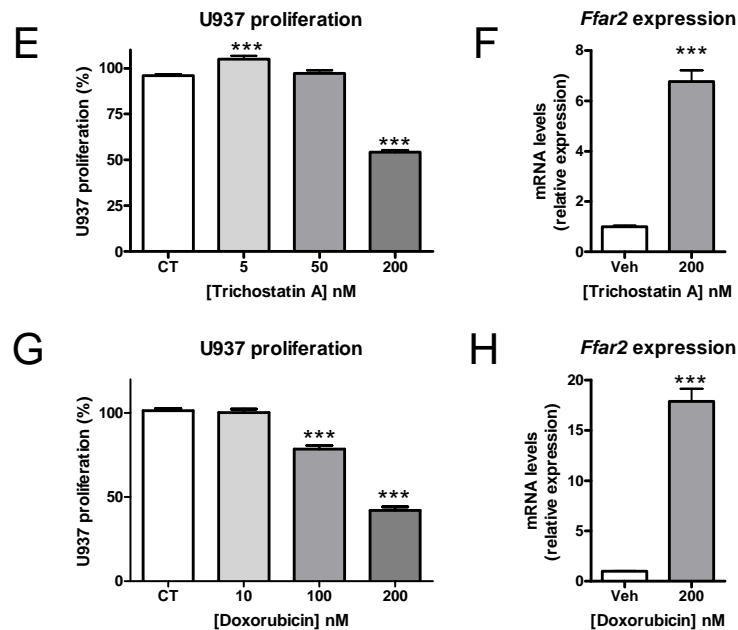

**Figure S3. Reduced cell proliferation is associated with increased *Ffar2* expression *in vitro* in two human leukemic cell lines.** Cell proliferation and *Ffar2* expression in HL-60 cells after 24 h incubation in presence of trichostatin A (A, B) and doxorubicin (C, D). Cell proliferation and *Ffar2* expression in U937 cells after 24 h incubation in presence of trichostatin A (E, F) and doxorubicin (G, H). Results of 3 independent experiments performed at least in triplicate are shown. \*\*  $P < 0.01$ , \*\*\*  $P < 0.001$  vs vehicle (Veh).
