# Supplementary material for: Ffar2 expression regulates leukaemic cell growth in vivo
Source: PubMed Central journal article supplement — Br J Cancer. 2017 Sep 5;117(9):1336–40. doi: 10.1038/bjc.2017.307 (PMC5672929; doi:10.1038/bjc.2017.307), 2017-09-05
Supplement: bjc2017307x2.pdf [file bjc2017307x2.pdf]

**SUPPLEMENTARY MATERIAL**

**Table S1: primer sequences**

| <b>Gene</b> | <b>Forward</b>         | <b>Reverse</b>         |
|-------------|------------------------|------------------------|
| Bcr-Abl     | TCCGCT GACCATCAATAAGGA | CACTCAGACCCTGAGGCTCAA  |
| mFFA2       | GGGATCTGGGTACATGCTTAT  | ATGTCAGACAGACGGGTACCAA |
| mRPL19      | GAAGGTCAAAGGGAATGTGTTC | CCTTGCTGCCTTCAGCTTGT   |
| hFFA2       | GGTCAATAGCCGTGGTGTTTC  | TGTCCTCATTTGTCCCCTCT   |
| hRPL19      | GCGGATTCTCATGGAACACA   | GGTCAGCCAGGAGCTTCTTG   |
